# Supplementary material for: Evaluating the tradeoffs of a generalist parasitoid fungus, Ophiocordyceps unilateralis, on different sympatric ant hosts
Source: PubMed Central journal article supplement (PMC7156370; doi:10.1038/s41598-020-63400-1), 2020-04-14
Supplement: 41598_2020_63400_MOESM1_ESM.pdf [file 41598_2020_63400_MOESM1_ESM.pdf]

**Evaluating the tradeoffs of a generalist parasitoid fungus, *Ophiocordyceps unilateralis*, on different sympatric ant hosts**

Wei-Jiun Lin<sup>1</sup>, Yung-I Lee<sup>2,3</sup>, Shao-Lun Liu<sup>4</sup>, Chung-Chi Lin<sup>1</sup>, Tan-Ya Chung<sup>1</sup>, and Jui-Yu Chou<sup>1\*</sup>

<sup>1</sup>Department of Biology, National Changhua University of Education, Changhua 500, Taiwan

<sup>2</sup>Biology Department, National Museum of Natural Science, Taichung 404, Taiwan

<sup>3</sup>Department of Life Sciences, National Chung Hsing University, Taichung 40227, Taiwan

<sup>4</sup>Department of Life Science & Center for Ecology and Environment, Tunghai University, Taichung 40704, Taiwan

\*Corresponding author. Tel: +886-4-7232105 Ext. 3426; Fax: 886-4-7211156; Email: [jackyjau@cc.ncue.edu.tw](mailto:jackyjau@cc.ncue.edu.tw)

Supplementary Figures

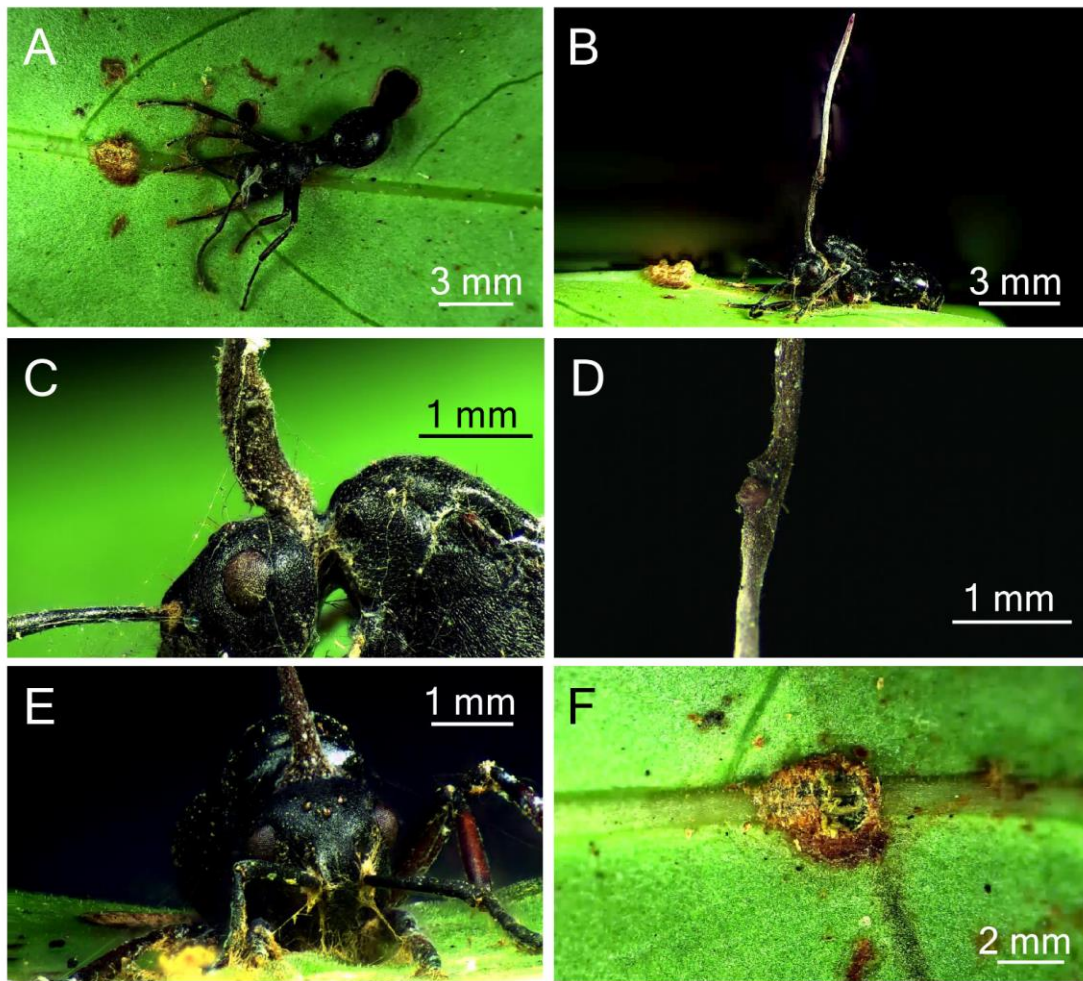

**Supplementary Fig. 1** *Ophiocordyceps unilateralis sensu lato*-infected *Polyrhachis mesota* (A) top view (B) side view (C) emerging stroma from the dorsal neck (D) stromata containing immature perithecia (E) frontal view of the ant biting the vein of the leaf (F) scars centered around its veins after the ant was gently removed from the leaf.

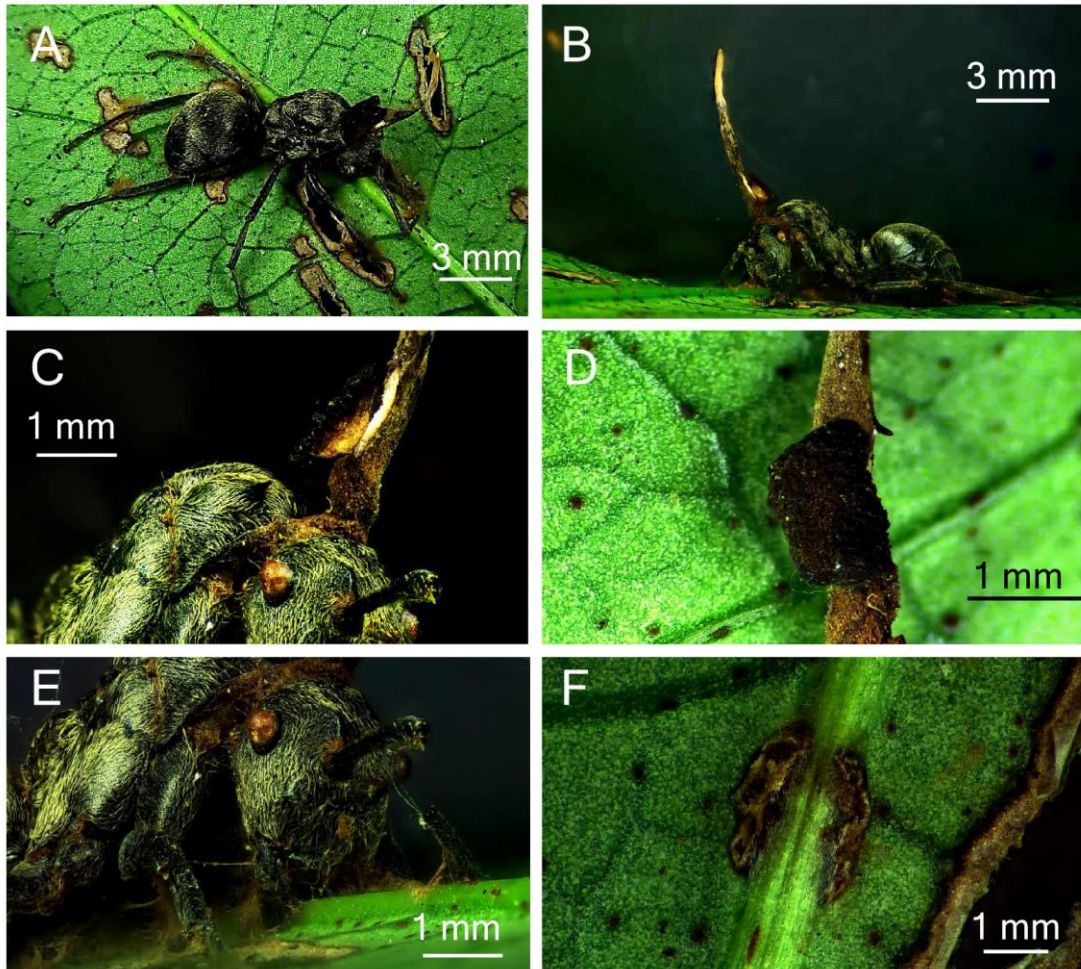

**Supplementary Fig. 2** *Ophiocordyceps unilateralis sensu lato*-infected *Polyrhachis wolfi* (A) top view (B) side view (C) emerging stroma from the dorsal neck (D) stromata containing mature perithecia (E) frontal view of the ant biting the vein of the leaf (F) dumbbell-shaped scars centered around its veins after the ant was gently removed from the leaf.

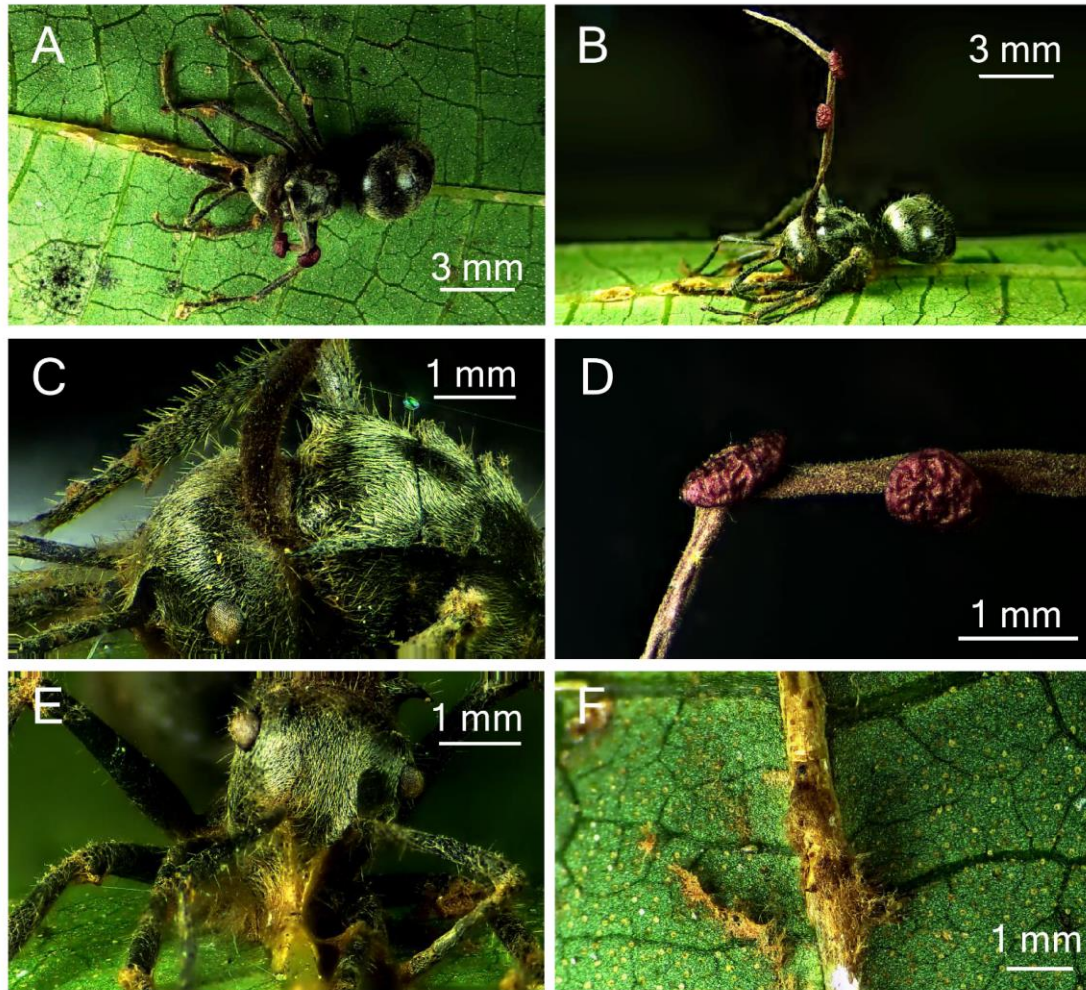

**Supplementary Fig. 3** *Ophiocordyceps unilateralis sensu lato*-infected *Polyrhachis vigilans* (A) top view (B) side view (C) emerging stroma from the dorsal neck (D) stromata containing two immature perithecia (E) frontal view of the ant biting the vein of the leaf (F) scars centered around its veins after the ant was gently removed from the leaf.

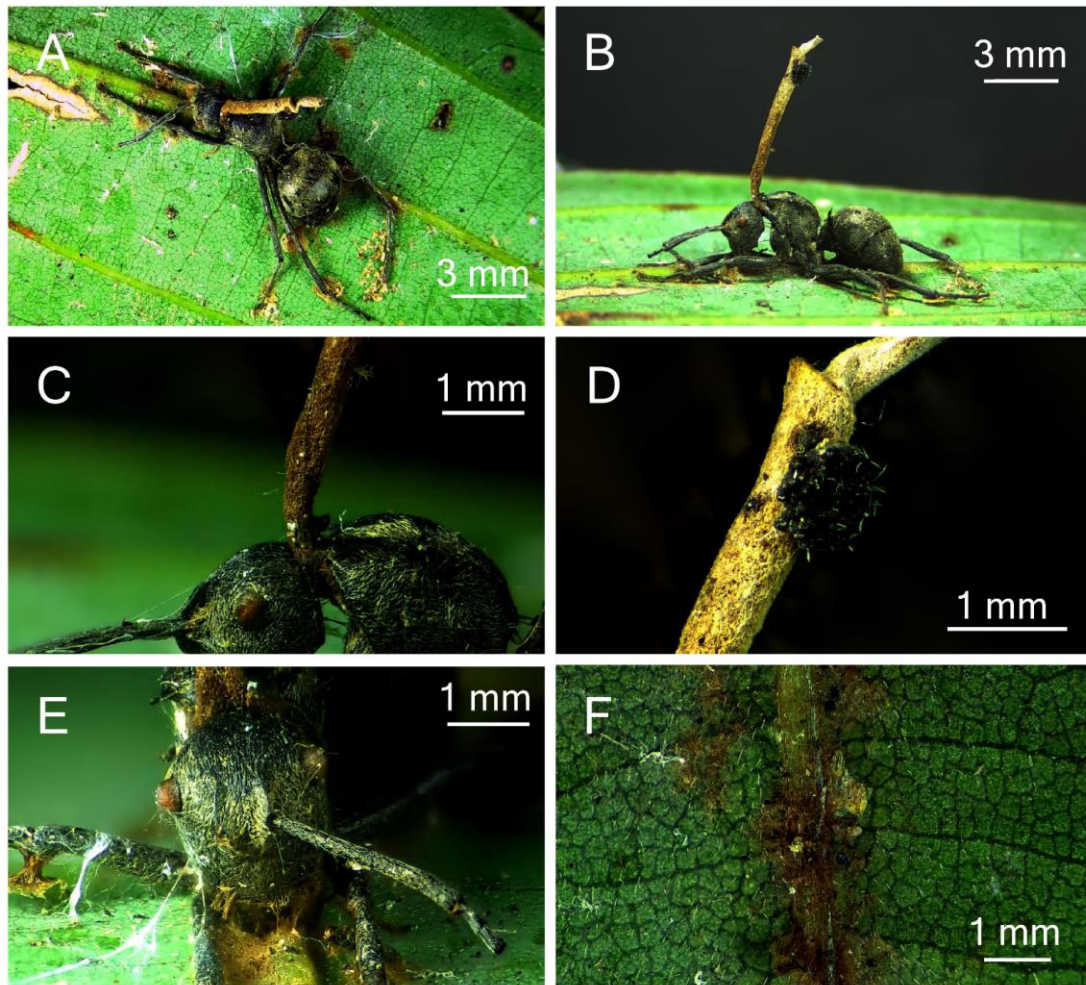

**Supplementary Fig. 4** *Ophiocordyceps unilateralis sensu lato*-infected *Polyrhachis latona* (A) top view (B) side view (C) emerging stroma from the dorsal neck (D) stromata containing mature perithecia (E) frontal view of the ant biting the vein of the leaf (F) scars centered around its veins after the ant was gently removed from the leaf.

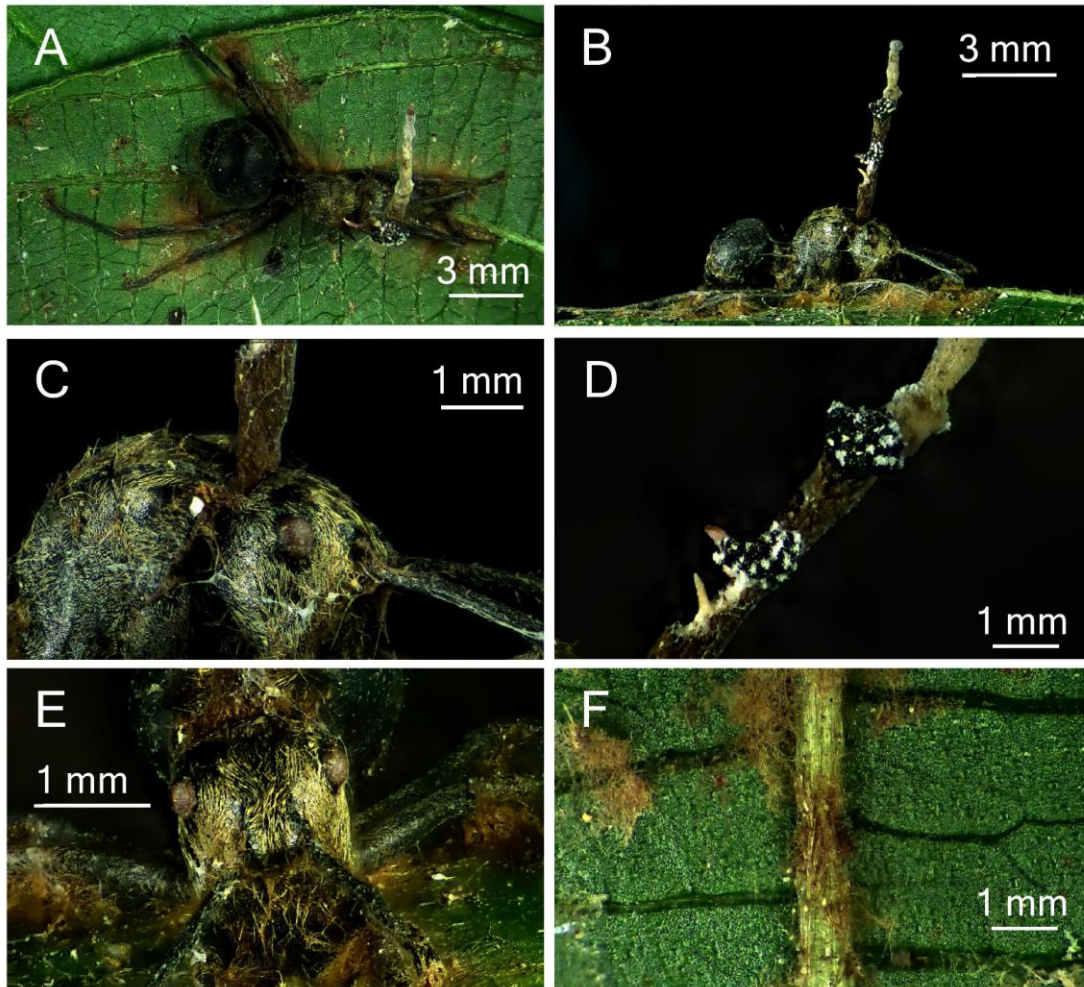

**Supplementary Fig. 5** *Ophiocordyceps unilateralis sensu lato* infected *Polyrhachis illaudata* (A) top view (B) side view (C) emerging stroma from the dorsal neck (D) stromata containing two immature perithecia with white hyperparasitic fungi (E) frontal view of the ant biting the vein of the leaf (F) scars centered around its veins after the ant was gently removed from the leaf.

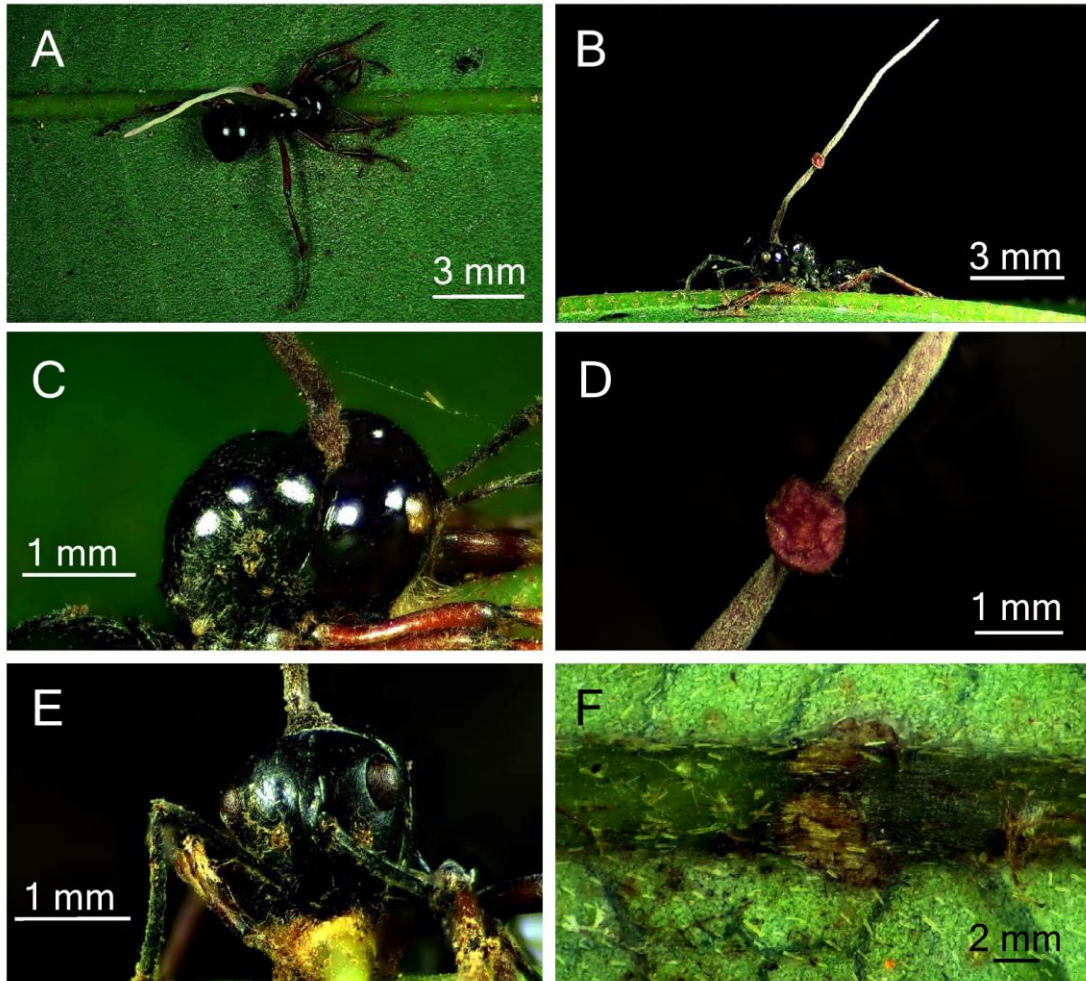

**Supplementary Fig. 6** *Ophiocordyceps unilateralis sensu lato*-infected *Polyrhachis debilis* (A) top view (B) side view (C) emerging stroma from the dorsal neck (D) stromata containing immature perithecia (E) frontal view of the ant biting the vein of the leaf (F) dumbbell-shaped scars centered around its veins after the ant was gently removed from the leaf.

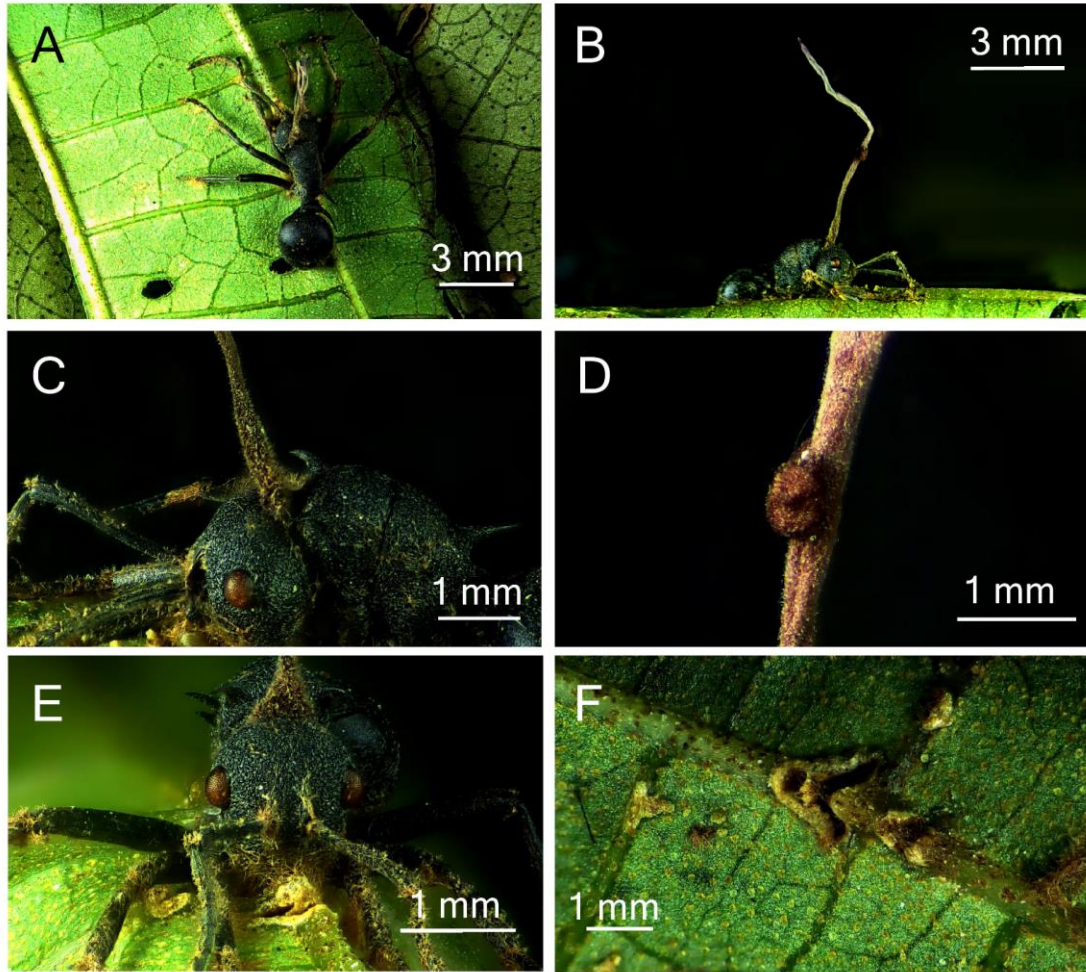

**Supplementary Fig. 7** *Ophiocordyceps unilateralis sensu lato*-infected *Polyrhachis dives* (A) top view (B) side view (C) emerging stroma from the dorsal neck (D) stromata containing immature perithecia (E) frontal view of the ant biting the vein of the leaf (F) scars centered around its veins after the ant was gently removed from the leaf.



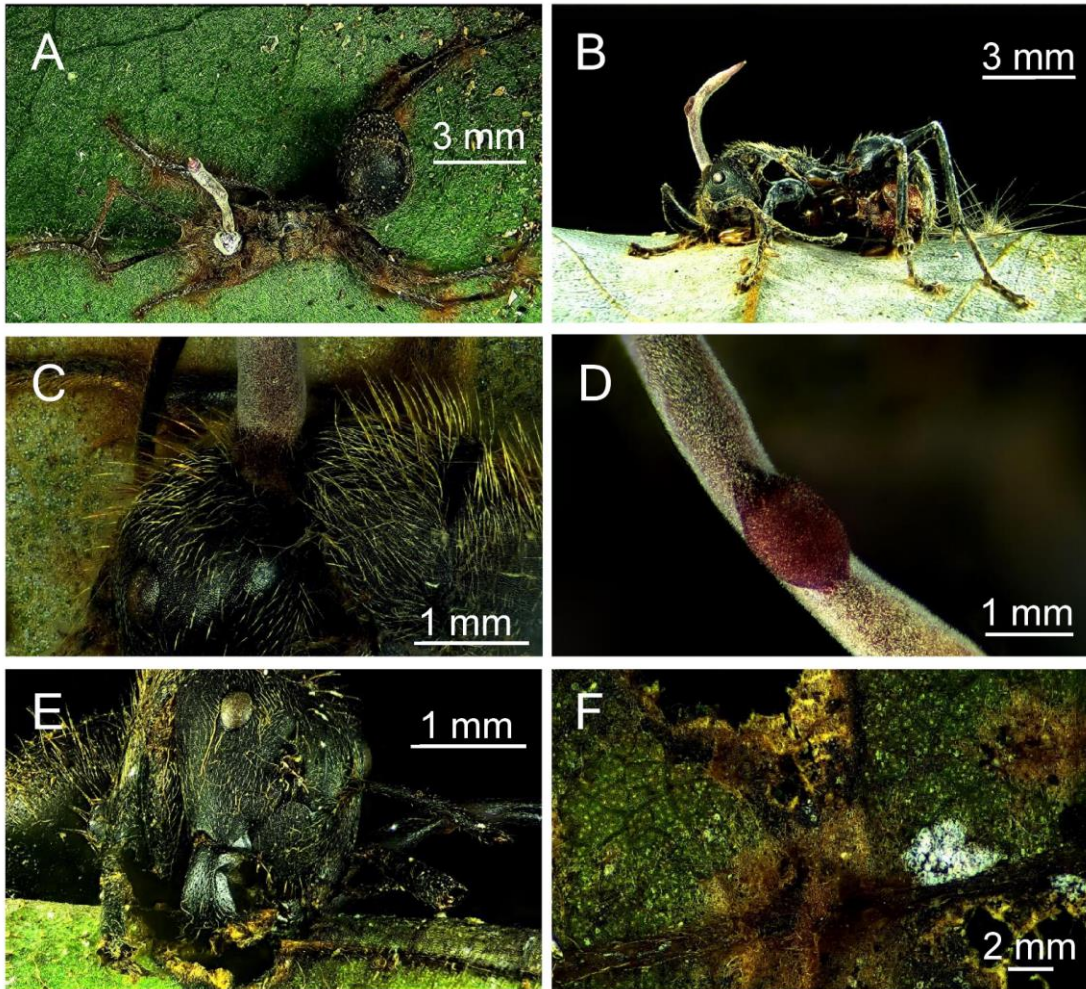

**Supplementary Fig. 8** *Ophiocordyceps unilateralis sensu lato*-infected *Camponotus punctatissimus* (A) top view (B) side view (C) emerging stroma from the dorsal neck (D) stromata containing immature perithecia (E) frontal view of the ant biting the vein of the leaf (F) scars centered around its veins after the ant was gently removed from the leaf.

## Neighbor-Joining

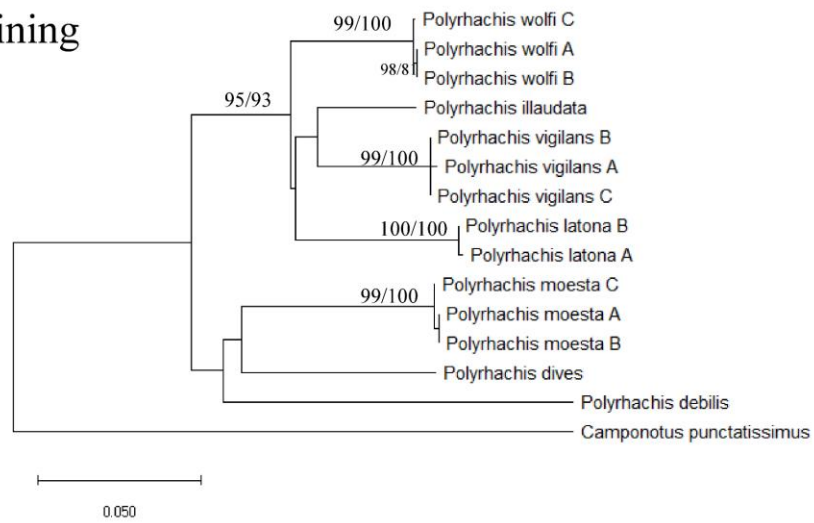

**Supplementary Fig. 9** Neighbor-joining *CO2* phylogeny showing that *Ophiocordyceps unilateralis* samples collected in this study infected eight sympatric ant hosts. The statistical support (>50%) based on bootstrap analyses are shown above the branches.

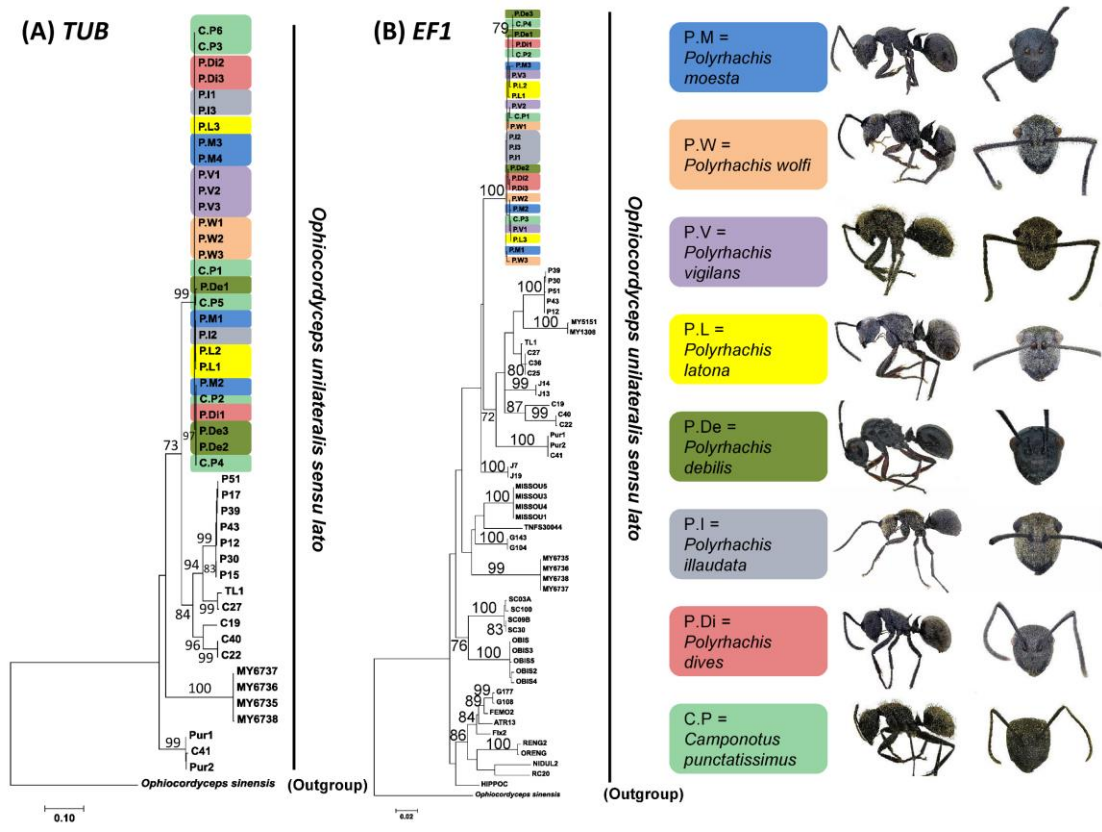

**Supplementary Fig. 10** (a) Maximum-likelihood TUB and (b) EF1 phylogeny showing that the infection of different *Ophiocordyceps unilateralis* samples from eight sympatric ant hosts (marked with color) is a monophyletic clade, indicative of the generalized infection of this fungal species. The statistical support (>70%) based on bootstrap analyses are shown above or below the branches. Scale bar indicates substitutions per site.

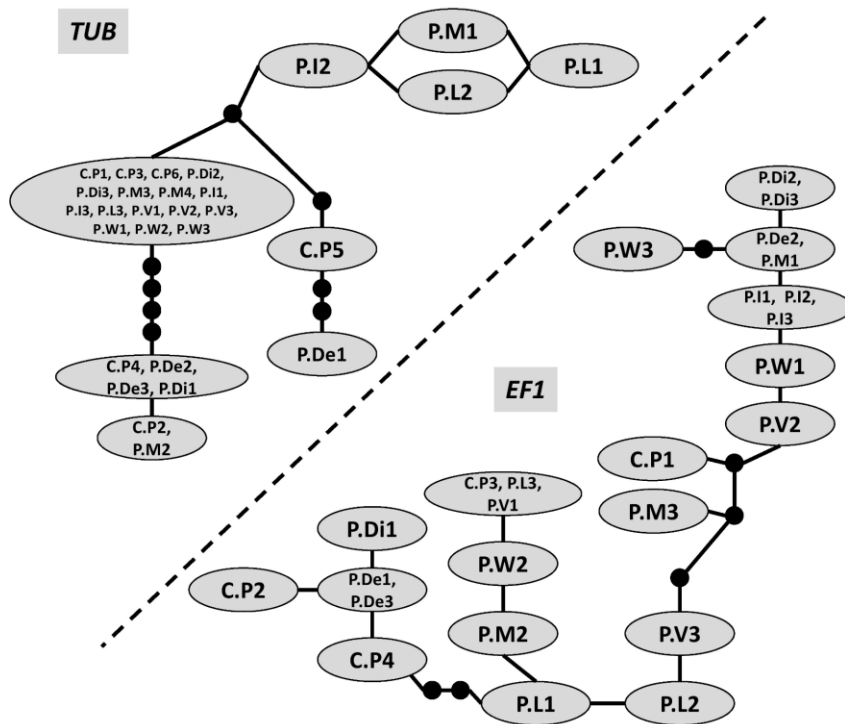

**Supplementary Fig. 11** Statistical parsimony network among different haplotypes of TUB (nine in total) and EF1 (18 haplotypes in total). There is no discernible population differentiation from the network analyses among haplotypes of TUB and EF1. Each line between circles represents one mutation step.

Table S1、 List of taxa and fungal samples used in this study, their host identity and corresponding NCBI accession number for EF1 and  $\beta$ -tubulin sequences.

| Taxa (as shown on phylogenetic trees) | Species                                                    | Host                        | EF1      | TUB      |
|---------------------------------------|------------------------------------------------------------|-----------------------------|----------|----------|
| <i>P.M1</i>                           | <i>Ophiocordyceps unilateralis sensu lato</i> <sup>1</sup> | <i>Polyrhachis moesta</i>   | MN218244 | MN218271 |
| <i>P.M2</i>                           |                                                            |                             | MN218245 | MN218272 |
| <i>P.M3</i>                           |                                                            |                             | MN218246 | MN218273 |
| <i>P.M4</i>                           |                                                            |                             | –        | MN218274 |
| <i>P.W1</i>                           |                                                            | <i>Polyrhachis wolfi</i>    | MN218247 | MN218275 |
| <i>P.W2</i>                           |                                                            |                             | MN218248 | MN218276 |
| <i>P.W3</i>                           |                                                            |                             | MN218249 | MN218277 |
| <i>P.V1</i>                           |                                                            | <i>Polyrhachis vigilans</i> | MN218253 | MN218281 |
| <i>P.V2</i>                           |                                                            |                             | MN218254 | MN218282 |
| <i>P.V3</i>                           |                                                            |                             | MN218255 | MN218283 |
| <i>P.L1</i>                           |                                                            | <i>Polyrhachis latona</i>   | MN218250 | MN218278 |
| <i>P.L2</i>                           |                                                            |                             | MN218251 | MN218279 |
| <i>P.L3</i>                           |                                                            |                             | MN218252 | MN218280 |
| <i>P.De1</i>                          |                                                            | <i>Polyrhachis debilis</i>  | MN218259 | MN218287 |
| <i>P.De2</i>                          |                                                            |                             | MN218260 | MN218288 |
| <i>P.De3</i>                          |                                                            |                             | MN218261 | MN218289 |

|              |                                             |                                  |                       |                       |
|--------------|---------------------------------------------|----------------------------------|-----------------------|-----------------------|
| <i>P.I1</i>  |                                             | <i>Polyrhachis illaudata</i>     | MN218256              | MN218284              |
| <i>P.I2</i>  |                                             |                                  | MN218257              | MN218285              |
| <i>P.I3</i>  |                                             |                                  | MN218258              | MN218286              |
| <i>P.Di1</i> |                                             | <i>Polyrhachis dives</i>         | MN218262              | MN218290              |
| <i>P.Di2</i> |                                             |                                  | MN218263              | MN218291              |
| <i>P.Di3</i> |                                             |                                  | MN218264              | MN218292              |
| <i>C.P1</i>  |                                             | <i>Camponotus punctatissimus</i> | MN218240              | MN218265              |
| <i>C.P2</i>  |                                             |                                  | MN218241              | MN218266              |
| <i>C.P3</i>  |                                             |                                  | MN218242              | MN218267              |
| <i>C.P4</i>  |                                             |                                  | MN218243              | MN218268              |
| <i>C.P5</i>  |                                             |                                  | –                     | MN218269              |
| <i>C.P6</i>  |                                             |                                  | –                     | MN218270              |
| <i>P39</i>   | <i>O. polyrhachis-furcata</i> <sup>2</sup>  | <i>Polyrhachis furcata</i>       | JN819003              | JN819051              |
| <i>P51</i>   |                                             |                                  | JN819000              | JN819054              |
| <i>P12</i>   |                                             |                                  | JN819030              | JN819055              |
| <i>P15</i>   |                                             |                                  | –                     | JN819060              |
| <i>P17</i>   |                                             |                                  | –                     | JN819061              |
| <i>P43</i>   |                                             |                                  | JN819001              | JN817053              |
| <i>P30</i>   |                                             |                                  | JN819034              | JN819058              |
| <i>C36</i>   | <i>O. camponoti-leonardi</i> <sup>2,3</sup> | <i>Camponotus leonardi</i>       | JN819013 <sup>2</sup> | –                     |
| <i>C27</i>   |                                             |                                  | JN819019 <sup>2</sup> | JN819038 <sup>2</sup> |
| <i>C25</i>   |                                             |                                  | JN819029 <sup>2</sup> | –                     |

|                    |                                            |                              |                       |                       |
|--------------------|--------------------------------------------|------------------------------|-----------------------|-----------------------|
| <i>TL1</i>         |                                            |                              | KJ201526 <sup>3</sup> | KJ201539 <sup>3</sup> |
| <i>C19</i>         | <i>O. camponoti-saundersi</i> <sup>2</sup> | <i>Camponotus saundersi</i>  | JN819015              | JN819042              |
| <i>C40</i>         |                                            |                              | JN819012              | JN819044              |
| <i>C22</i>         |                                            |                              | JN819014              | JN819043              |
| <i>C41</i>         | <i>O. septa</i> <sup>2,3</sup>             | <i>Camponotus sp.</i>        | JN819037 <sup>2</sup> | JN819046 <sup>2</sup> |
| <i>Pur1</i>        |                                            |                              | KJ201528 <sup>3</sup> | KJ201540 <sup>3</sup> |
| <i>Pur2</i>        |                                            |                              | KJ201529 <sup>3</sup> | KJ201541 <sup>3</sup> |
| <i>MY6735</i>      | <i>O. rami</i> <sup>3</sup>                | <i>Camponotus sp.</i>        | KJ201531              | KJ201535              |
| <i>MY6736</i>      |                                            |                              | KJ201532              | KJ201536              |
| <i>MY6737</i>      |                                            |                              | KJ201533              | KJ201537              |
| <i>MY6738</i>      |                                            |                              | KJ201534              | KJ201538              |
| <i>MY1308</i>      | <i>O. halabalaensis</i> <sup>4</sup>       | <i>Camponotus gigas</i>      | GU797109              | –                     |
| <i>MY5151</i>      |                                            |                              | GU797110              | –                     |
| <i>TNF-S 30044</i> | <i>O. pulvinata</i> <sup>5</sup>           | <i>Camponotus obscuripes</i> | GU904209              | –                     |
| <i>MISSOU5</i>     | <i>O. blakebarnesii</i> <sup>6</sup>       | <i>Camponotus sp.</i>        | KX713688              | –                     |
| <i>MISSOU4</i>     |                                            |                              | KX713685              | –                     |
| <i>MISSOU3</i>     |                                            |                              | KX713687              | –                     |
| <i>MISSOU1</i>     |                                            |                              | KX713686              | –                     |
| <i>ATRI3</i>       | <i>O. camponoti-atricipis</i> <sup>6</sup> | <i>Camponotus atriceps</i>   | KX713677              | –                     |
| <i>G143</i>        | <i>O. camponoti-balzani</i> <sup>6</sup>   | <i>Camponotus balzani</i>    | KX713690              | –                     |
| <i>G104</i>        |                                            |                              | KX713689              | –                     |
| <i>OBIS5</i>       | <i>O. camponoti-bispinosi</i> <sup>6</sup> | <i>Camponotus bispinosus</i> | KX713693              | –                     |

|                  |                                                |                                |          |          |
|------------------|------------------------------------------------|--------------------------------|----------|----------|
| <i>OBIS4</i>     |                                                |                                | KX713692 | –        |
| <i>OBIS3</i>     |                                                |                                | KX713695 | –        |
| <i>OBIS</i>      |                                                |                                | KX713694 | –        |
| <i>OBIS2</i>     |                                                |                                | KX713691 | –        |
| <i>FEMO2</i>     | <i>O. camponoti-femorati</i> <sup>6</sup>      | <i>Camponotus femoratus</i>    | KX713678 | –        |
| <i>Flx2</i>      | <i>O. camponoti-floridani</i> <sup>6</sup>     | <i>Camponotus floridanus</i>   | KX713674 | –        |
| <i>HIPPOC</i>    | <i>O. camponoti-hippocrepidis</i> <sup>6</sup> | <i>Camponotus hippocrepis</i>  | KX713673 | –        |
| <i>NIDUL2</i>    | <i>O. camponoti-nidulantis</i> <sup>6</sup>    | <i>Camponotus nidulans</i>     | KX713669 | –        |
| <i>RENG2</i>     | <i>O. camponoti-renggeri</i> <sup>6</sup>      | <i>Camponotus renggeri</i>     | KX713672 | –        |
| <i>ORENG</i>     |                                                |                                | KX713671 | –        |
| <i>G177</i>      | <i>O. camponoti-rufipedis</i> <sup>6</sup>     | <i>Camponotus rufipes</i>      | KX713680 | –        |
| <i>G108</i>      |                                                |                                | KX713679 | –        |
| <i>J19</i>       | <i>O. satoi</i> <sup>6</sup>                   | <i>Polyrhachis lamellidens</i> | KX713684 | –        |
| <i>J7</i>        |                                                |                                | KX713683 | –        |
| <i>SC30</i>      | <i>O. kimflemingiae</i> <sup>6</sup>           | <i>Camponotus castaneus</i>    | KX713699 | –        |
| <i>SC09B</i>     |                                                |                                | KX713698 | –        |
| <i>SC03A</i>     |                                                |                                | KX713697 | –        |
| <i>SC100</i>     |                                                |                                | KX713696 | –        |
| <i>J14</i>       | <i>O. ootakii</i> <sup>6</sup>                 | <i>Polyrhachis moesta</i>      | KX713682 | –        |
| <i>J13</i>       |                                                |                                | KX713681 | –        |
| <i>RC20</i>      | <i>O. albacongiuae</i> <sup>6</sup>            | <i>Camponotus sp.</i>          | KX713670 | –        |
| <i>Out group</i> | <i>O. sinensis</i> <sup>7</sup>                | <i>Lepidopteran pupa</i>       | JX968018 | JX968023 |



<sup>1</sup> This study

<sup>2</sup> Kobmoo, N., Mongkolsamrit, S., Tسانathai, K., Thanakitpipattana, D., & Luangsa-Ard, J. J. (2012). Molecular phylogenies reveal host-specific divergence of *Ophiocordyceps unilateralis sensu lato* following its host ants. *Molecular Ecology*, 21(12), 3022-3031.

<sup>3</sup> Kobmoo, N., Mongkolsamrit, S., Wutikhun, T., Tسانathai, K., Khonsanit, A., Thanakitpipattana, D., & Luangsa-Ard, J. J. (2015). New species of *Ophiocordyceps unilateralis*, an ubiquitous pathogen of ants from Thailand. *Fungal biology*, 119(1), 44-52.

<sup>4</sup> Luangsa-Ard, J. J., Ridkaew, R., Tسانathai, K., Thanakitpipattana, D., & Hywel-Jones, N. (2011). *Ophiocordyceps halabalaensis*: a new species of *Ophiocordyceps* pathogenic to *Camponotus gigas* in Hala Bala Wildlife Sanctuary, Southern Thailand. *Fungal biology*, 115(7), 608-614.

<sup>5</sup> Kepler, R. M., Kaitsu, Y., Tanaka, E., Shimano, S., & Spatafora, J. W. (2011). *Ophiocordyceps pulvinata* sp. nov., a pathogen with a reduced stroma. *Mycoscience*, 52(1), 39-47.

<sup>6</sup> Araújo, J. P., Evans, H. C., Kepler, R., & Hughes, D. P. (2018). Zombie-ant fungi across continents: 15 new species and new combinations within *Ophiocordyceps*. I. Myrmecophilous hirsutelloid species. *Studies in Mycology*, 90, 119-160.

<sup>7</sup> Zhang, S., Zhang, Y. J., Liu, X. Z., Zhang, H., & Liu, D. S. (2013). On the reliability of DNA sequences of *Ophiocordyceps sinensis* in public databases. *Journal of industrial microbiology & biotechnology*, 40(3-4), 365-378.
